# Supplementary material
Source: PubMed Central journal article supplement (PMC5436050)
Supplement: NIHMS856979-supplement-Figure_S1.pdf [file NIHMS856979-supplement-Figure_S1.pdf]

Supporting Information

**Single Molecule Studies on the Linker Histone H1 Binding to DNA and the Nucleosome**

Hongjun Yue<sup>1</sup>, He Fang<sup>2</sup>, Sijie Wei<sup>1</sup>, Jeffrey J. Hayes<sup>2</sup>, and Tae-Hee Lee<sup>1,\*</sup>

<sup>1</sup> Department of Chemistry, the Pennsylvania State University, University Park, PA16802

<sup>2</sup>Department of Biochemistry and Biophysics, Rochester University Medical Center, Rochester, NY 14625

\* Correspondence to: txl18@psu.edu

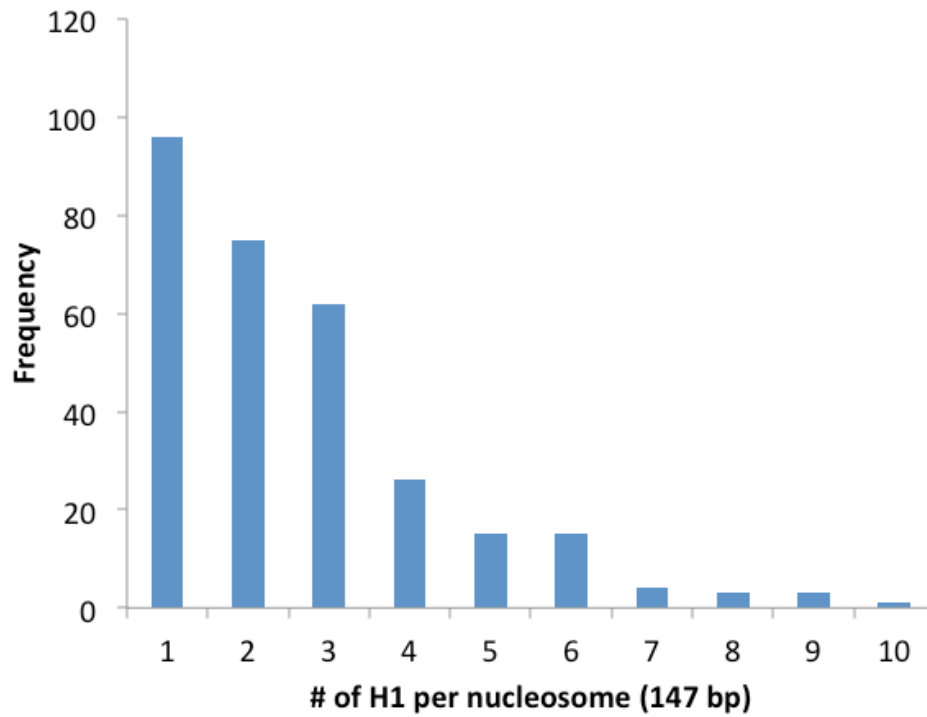

**Fig. S1.** H1 stoichiometry distribution on the nucleosome made of 147 bp (the same DNA sequence used for the measurements in the paper, see the Materials and Methods section for the sequence information).  $98.2 \pm 1.9$  % of the nucleosome substrates were bound with mono- or poly-H1. The error is the standard deviation of three independent measurements on three different microscope slides.
